# Supplementary material for: Boolean logic algebra driven similarity measure for text based applications
Source: PeerJ journal article supplement (doi:10.7717/peerj-cs.641), 2021-07-29
Supplement: BLAB-SM-Appendix-_Sample_for_Review_-_Peerj_CS.pdf [file BLAB-SM-Appendix-_Sample_for_Review_-_Peerj_CS.pdf]

**Appendix (sample for review)**

In the next pages, we provide only a sample of the averaged results over the whole number of features on both datasets for BLAB-SM and SMTP similarity measures. The ultimate purpose of this sample is to bring the kind attention of the respected Editorial Board and the prospective reviewers into the full picture of the work. The code (that produces all results) is provided on GitHub via this link <https://github.com/aliamer/Boolean-Logic-Algebra-Driven-Similarity-Measure-for-Text-Based-Applications>

Moreover, a sample of results of jaccard is provided to prove that jaccard is a poor choice when dealing with tfidf based document matching.

**BLAB-SM Similarity Measure**

| No. of features | Metric             | Measure            | k  | Reuters-8          | Web-Kb             |
|-----------------|--------------------|--------------------|----|--------------------|--------------------|
| ALL             | BLAB_SM            | Accuracy           | 1  | 0.9302426343154246 | 0.7777777777777778 |
|                 |                    |                    | 3  | 0.932842287694974  | 0.7888888888888889 |
|                 |                    |                    | 5  | 0.9376083188908145 | 0.8206349206349206 |
|                 |                    |                    | 7  | 0.9345753899480069 | 0.8293650793650794 |
|                 |                    |                    | 9  | 0.9332755632582322 | 0.8238095238095238 |
|                 |                    |                    | 11 | 0.9324090121317158 | 0.8214285714285714 |
|                 |                    |                    | 13 | 0.9280762564991335 | 0.8182539682539682 |
|                 |                    |                    | 15 | 0.9233102253032929 | 0.8158730158730159 |
|                 |                    |                    | 17 | 0.9194107452339688 | 0.8214285714285714 |
|                 |                    |                    | 19 | 0.9211438474870017 | 0.8246031746031746 |
|                 |                    |                    | 21 | 0.9150779896013865 | 0.8238095238095238 |
|                 |                    |                    | 23 | 0.9172443674176777 | 0.8269841269841269 |
|                 |                    |                    | 25 | 0.9168110918544194 | 0.8214285714285714 |
|                 |                    |                    | 27 | 0.9137781629116117 | 0.8277777777777777 |
|                 |                    |                    | 29 | 0.912478336221837  | 0.8214285714285714 |
|                 |                    |                    | 31 | 0.9120450606585788 | 0.819047619047619  |
|                 |                    |                    | 33 | 0.9133448873483535 | 0.8166666666666667 |
|                 |                    |                    | 35 | 0.9103119584055459 | 0.8182539682539682 |
|                 |                    |                    | 37 | 0.9077123050259965 | 0.8182539682539682 |
|                 |                    |                    | 39 | 0.9081455805892548 | 0.8222222222222222 |
|                 |                    |                    | 41 | 0.9055459272097054 | 0.8166666666666667 |
|                 |                    |                    | 43 | 0.9072790294627383 | 0.8142857142857143 |
|                 |                    |                    | 45 | 0.9055459272097054 | 0.8134920634920635 |
|                 |                    |                    | 47 | 0.9042461005199307 | 0.8158730158730159 |
|                 |                    |                    | 49 | 0.9038128249566725 | 0.8134920634920635 |
|                 |                    |                    | 51 | 0.9055459272097054 | 0.8134920634920635 |
|                 |                    |                    | 53 | 0.9033795493934142 | 0.8158730158730159 |
|                 |                    |                    | 55 | 0.9020797227036396 | 0.8182539682539682 |
|                 |                    |                    | 57 | 0.9016464471403813 | 0.8150793650793651 |
| 59              | 0.9003466204506065 | 0.8166666666666667 |    |                    |                    |

|  |  |  |         |                    |                    |
|--|--|--|---------|--------------------|--------------------|
|  |  |  | 61      | 0.901213171577123  | 0.8174603174603174 |
|  |  |  | 63      | 0.8977469670710572 | 0.8142857142857143 |
|  |  |  | 65      | 0.8977469670710572 | 0.8150793650793651 |
|  |  |  | 67      | 0.8977469670710572 | 0.8103174603174603 |
|  |  |  | 69      | 0.8960138648180243 | 0.8142857142857143 |
|  |  |  | 71      | 0.8964471403812825 | 0.8134920634920635 |
|  |  |  | 73      | 0.8947140381282496 | 0.8119047619047619 |
|  |  |  | 75      | 0.8947140381282496 | 0.8126984126984127 |
|  |  |  | 77      | 0.8929809358752167 | 0.8103174603174603 |
|  |  |  | 79      | 0.8921143847487002 | 0.8111111111111111 |
|  |  |  | 81      | 0.8912478336221837 | 0.8103174603174603 |
|  |  |  | 83      | 0.8903812824956673 | 0.8087301587301587 |
|  |  |  | 85      | 0.8903812824956673 | 0.8095238095238095 |
|  |  |  | 87      | 0.8890814558058926 | 0.8103174603174603 |
|  |  |  | 89      | 0.8895147313691508 | 0.8142857142857143 |
|  |  |  | 91      | 0.8890814558058926 | 0.807936507936508  |
|  |  |  | 93      | 0.8882149046793761 | 0.8047619047619048 |
|  |  |  | 95      | 0.8886481802426344 | 0.8071428571428572 |
|  |  |  | 97      | 0.8882149046793761 | 0.8047619047619048 |
|  |  |  | 99      | 0.8873483535528596 | 0.8055555555555556 |
|  |  |  | 101     | 0.8864818024263431 | 0.8047619047619048 |
|  |  |  | 103     | 0.8860485268630849 | 0.803968253968254  |
|  |  |  | 105     | 0.8851819757365684 | 0.8023809523809524 |
|  |  |  | 107     | 0.8834488734835355 | 0.8007936507936508 |
|  |  |  | 109     | 0.8830155979202773 | 0.8007936507936508 |
|  |  |  | 111     | 0.8830155979202773 | 0.7992063492063493 |
|  |  |  | 113     | 0.8804159445407279 | 0.8007936507936508 |
|  |  |  | 115     | 0.8804159445407279 | 0.8007936507936508 |
|  |  |  | 117     | 0.8791161178509532 | 0.7984126984126985 |
|  |  |  | 119     | 0.8782495667244368 | 0.7984126984126985 |
|  |  |  | Average | 0.9023035817446563 | 0.812261904761905  |

| No. of features | Metric  | Measure   | k  | Reuters-8          | Web-Kb             |
|-----------------|---------|-----------|----|--------------------|--------------------|
| ALL             | BLAB_SM | Precision | 1  | 0.8854672928291207 | 0.763044697748645  |
|                 |         |           | 3  | 0.8897512106788055 | 0.8289770442776742 |
|                 |         |           | 5  | 0.9040055474785454 | 0.8569434576487417 |
|                 |         |           | 7  | 0.8968417008201113 | 0.8740917229792855 |
|                 |         |           | 9  | 0.9029308192561671 | 0.8698667791655103 |
|                 |         |           | 11 | 0.9119939660167289 | 0.8687958023266296 |
|                 |         |           | 13 | 0.8931815409653767 | 0.8658929595689282 |
|                 |         |           | 15 | 0.886874335698371  | 0.866190740275685  |
|                 |         |           | 17 | 0.8745262402630039 | 0.8703484113002906 |
|                 |         |           | 19 | 0.8839450687079726 | 0.8725564962706431 |
|                 |         |           | 21 | 0.8720880771049108 | 0.8720743573739801 |

|  |  |  |     |                    |                    |
|--|--|--|-----|--------------------|--------------------|
|  |  |  | 23  | 0.8760182937940711 | 0.8754934091116691 |
|  |  |  | 25  | 0.8704208837664332 | 0.8716148303667356 |
|  |  |  | 27  | 0.8672355524117455 | 0.8751152166510207 |
|  |  |  | 29  | 0.8668301562289489 | 0.8716299140151688 |
|  |  |  | 31  | 0.8593712776356528 | 0.8695109227760474 |
|  |  |  | 33  | 0.8582159399744141 | 0.8683853142298346 |
|  |  |  | 35  | 0.8702989438121966 | 0.8696988405298413 |
|  |  |  | 37  | 0.8671810759936112 | 0.86932283655253   |
|  |  |  | 39  | 0.8993261189375525 | 0.8714360373809589 |
|  |  |  | 41  | 0.896454966586703  | 0.8681212567453549 |
|  |  |  | 43  | 0.8983228483761032 | 0.8662763441447421 |
|  |  |  | 45  | 0.8986654682002241 | 0.8661494340574037 |
|  |  |  | 47  | 0.8959984931407865 | 0.8681073245604715 |
|  |  |  | 49  | 0.8983345972666194 | 0.8660955518791049 |
|  |  |  | 51  | 0.8954951505861202 | 0.8657740714739761 |
|  |  |  | 53  | 0.8953749532087146 | 0.8681440162271805 |
|  |  |  | 55  | 0.8936806214329377 | 0.8688811417206208 |
|  |  |  | 57  | 0.8928109783930268 | 0.867297551685776  |
|  |  |  | 59  | 0.8921595434103977 | 0.8696002450192062 |
|  |  |  | 61  | 0.8926362002020128 | 0.8701024122915328 |
|  |  |  | 63  | 0.8900632765090578 | 0.8667825559142421 |
|  |  |  | 65  | 0.8898224088229278 | 0.8674428408901416 |
|  |  |  | 67  | 0.8907351842238409 | 0.8636666248695113 |
|  |  |  | 69  | 0.8892131655984723 | 0.8677689585355133 |
|  |  |  | 71  | 0.8941049435355359 | 0.8670553477801377 |
|  |  |  | 73  | 0.8848248337763078 | 0.8668435753748139 |
|  |  |  | 75  | 0.8863126236538215 | 0.8658075895214936 |
|  |  |  | 77  | 0.883240545695896  | 0.8627243918206033 |
|  |  |  | 79  | 0.882530812504329  | 0.8639379829004734 |
|  |  |  | 81  | 0.8815511192717329 | 0.863798783452685  |
|  |  |  | 83  | 0.8823070889172527 | 0.8627665984261121 |
|  |  |  | 85  | 0.7582509817280293 | 0.8631217933160306 |
|  |  |  | 87  | 0.7565362336937878 | 0.8635557871668762 |
|  |  |  | 89  | 0.7599501469007665 | 0.8664846579973577 |
|  |  |  | 91  | 0.759500067980406  | 0.8612413628422708 |
|  |  |  | 93  | 0.755662098458009  | 0.8591880513365837 |
|  |  |  | 95  | 0.881681464689509  | 0.8621705921958873 |
|  |  |  | 97  | 0.8821085315276285 | 0.859465129925488  |
|  |  |  | 99  | 0.7541643551898514 | 0.8605128257640084 |
|  |  |  | 101 | 0.752042859690683  | 0.8602314556816806 |
|  |  |  | 103 | 0.7498655565387127 | 0.8591887761679045 |
|  |  |  | 105 | 0.7437788816301982 | 0.8582046566285491 |
|  |  |  | 107 | 0.7473290124181355 | 0.8573675995007649 |
|  |  |  | 109 | 0.7479752993375706 | 0.856779306609677  |
|  |  |  | 111 | 0.747986124132421  | 0.8673161041071942 |
|  |  |  | 113 | 0.7432972119827275 | 0.8689685083496245 |

|  |  |  |         |                    |                    |
|--|--|--|---------|--------------------|--------------------|
|  |  |  | 115     | 0.7423716729958669 | 0.8693227392845355 |
|  |  |  | 117     | 0.7423474239455703 | 0.8673866337292298 |
|  |  |  | 119     | 0.7405244877076635 | 0.8675771397802151 |
|  |  |  | Average | 0.8501086046039016 | 0.8640369585037467 |

| No. of features | Metric             | Measure            | k  | Reuters-8          | Web-Kb             |
|-----------------|--------------------|--------------------|----|--------------------|--------------------|
| ALL             | BLAB_SM            | Recall             | 1  | 0.8364233153003058 | 0.7239316057848948 |
|                 |                    |                    | 3  | 0.8171698668800876 | 0.7203487878101436 |
|                 |                    |                    | 5  | 0.8323036925473892 | 0.751834479568155  |
|                 |                    |                    | 7  | 0.8078475119429838 | 0.7628349519933117 |
|                 |                    |                    | 9  | 0.7998599074359378 | 0.7545369196775191 |
|                 |                    |                    | 11 | 0.781502589559804  | 0.7497059057243831 |
|                 |                    |                    | 13 | 0.7716677326967578 | 0.7475232905734012 |
|                 |                    |                    | 15 | 0.7627624336092724 | 0.7424575362491347 |
|                 |                    |                    | 17 | 0.7390772702748225 | 0.7466309303168198 |
|                 |                    |                    | 19 | 0.7498930083292341 | 0.7488135454678017 |
|                 |                    |                    | 21 | 0.7248122128804134 | 0.7457746462100062 |
|                 |                    |                    | 23 | 0.7264469508056655 | 0.7481736576111422 |
|                 |                    |                    | 25 | 0.7185219362876631 | 0.7397214077102907 |
|                 |                    |                    | 27 | 0.7102950279828326 | 0.7434144169940076 |
|                 |                    |                    | 29 | 0.7053853845378748 | 0.7398019304963622 |
|                 |                    |                    | 31 | 0.705692987470506  | 0.7335322957464927 |
|                 |                    |                    | 33 | 0.7012622717501167 | 0.7330606604125945 |
|                 |                    |                    | 35 | 0.7036574020435369 | 0.7301849613185791 |
|                 |                    |                    | 37 | 0.6938974013399638 | 0.7282768597795845 |
|                 |                    |                    | 39 | 0.692267316623974  | 0.7321956268557108 |
|                 |                    |                    | 41 | 0.6806696202818115 | 0.7252556925505802 |
|                 |                    |                    | 43 | 0.6878568150827724 | 0.7220426890872975 |
|                 |                    |                    | 45 | 0.6736710833389024 | 0.7186331759942889 |
|                 |                    |                    | 47 | 0.6708767090868857 | 0.7208403511611462 |
|                 |                    |                    | 49 | 0.6671933640423742 | 0.7169414707054482 |
| 51              | 0.6780453466642533 | 0.7164166392851762 |    |                    |                    |
| 53              | 0.6726869146248307 | 0.7197101655345306 |    |                    |                    |
| 55              | 0.6607032503994579 | 0.7205524147036417 |    |                    |                    |
| 57              | 0.6595802709508045 | 0.7189683257719194 |    |                    |                    |
| 59              | 0.6579482966737816 | 0.7237182048467986 |    |                    |                    |
| 61              | 0.6594740687417986 | 0.724404693931399  |    |                    |                    |
| 63              | 0.6529612000909624 | 0.7196097561280308 |    |                    |                    |
| 65              | 0.6513983093682818 | 0.7187335854007888 |    |                    |                    |
| 67              | 0.6476840148979287 | 0.7115411786957364 |    |                    |                    |
| 69              | 0.6429647596543226 | 0.7189860578007107 |    |                    |                    |
| 71              | 0.6472830164133232 | 0.7163361164991047 |    |                    |                    |
| 73              | 0.6372370170152657 | 0.714698219388823  |    |                    |                    |
| 75              | 0.6368157708334283 | 0.7149152277311623 |    |                    |                    |

|  |  |  |         |                    |                    |
|--|--|--|---------|--------------------|--------------------|
|  |  |  | 77      | 0.6290060586643664 | 0.7095593823577542 |
|  |  |  | 79      | 0.6253612140986331 | 0.7112955342828987 |
|  |  |  | 81      | 0.6148179851791583 | 0.7100842137780263 |
|  |  |  | 83      | 0.6135957115415809 | 0.7091505377811365 |
|  |  |  | 85      | 0.6051197003774327 | 0.7094228968014866 |
|  |  |  | 87      | 0.6013154569058505 | 0.7090162068165058 |
|  |  |  | 89      | 0.602839847149753  | 0.713089191477691  |
|  |  |  | 91      | 0.600326453133172  | 0.7047283684046183 |
|  |  |  | 93      | 0.5984400726203608 | 0.7019957497253038 |
|  |  |  | 95      | 0.6047521044341463 | 0.7065736791863326 |
|  |  |  | 97      | 0.6022534465052913 | 0.7013720513979836 |
|  |  |  | 99      | 0.5911578391155561 | 0.7029471577509849 |
|  |  |  | 101     | 0.588364846687654  | 0.7021316231893863 |
|  |  |  | 103     | 0.5880783402562508 | 0.7000870360941238 |
|  |  |  | 105     | 0.5827265453129076 | 0.6992270548962214 |
|  |  |  | 107     | 0.581335161231509  | 0.6975891577859399 |
|  |  |  | 109     | 0.5791321736654494 | 0.6969101087806089 |
|  |  |  | 111     | 0.5787029894032316 | 0.6955069520414578 |
|  |  |  | 113     | 0.5732389981876576 | 0.6963669332393603 |
|  |  |  | 115     | 0.5723800966431035 | 0.6961321928682298 |
|  |  |  | 117     | 0.5667687502047436 | 0.6944566771087286 |
|  |  |  | 119     | 0.5637555712515516 | 0.6942219367375981 |
|  |  |  | Average | 0.665487756850495  | 0.720448717066988  |

| No. of features | Metric             | Measure            | k  | Reuters-8          | Web-Kb             |
|-----------------|--------------------|--------------------|----|--------------------|--------------------|
| ALL             | BLAB_SM            | F Measure          | 1  | 0.8580264098679282 | 0.7342212535380959 |
|                 |                    |                    | 3  | 0.8467937587288485 | 0.7375615144377822 |
|                 |                    |                    | 5  | 0.8621846295200323 | 0.7689605449028104 |
|                 |                    |                    | 7  | 0.8414097775794236 | 0.7814391182747872 |
|                 |                    |                    | 9  | 0.8385343239839316 | 0.770989207406206  |
|                 |                    |                    | 11 | 0.8252765778918649 | 0.7658918834809404 |
|                 |                    |                    | 13 | 0.8138129384179085 | 0.7632634866185875 |
|                 |                    |                    | 15 | 0.8060756605865587 | 0.7587953091785058 |
|                 |                    |                    | 17 | 0.7825489714526759 | 0.7630381607162916 |
|                 |                    |                    | 19 | 0.7959809676883773 | 0.7654063459138897 |
|                 |                    |                    | 21 | 0.7721178617803538 | 0.7615238773853423 |
|                 |                    |                    | 23 | 0.7743820227954321 | 0.7653456917661463 |
|                 |                    |                    | 25 | 0.763289596023708  | 0.7546115444390523 |
|                 |                    |                    | 27 | 0.7561110796855177 | 0.7569608768473808 |
|                 |                    |                    | 29 | 0.750976583104018  | 0.7545370977450918 |
|                 |                    |                    | 31 | 0.7501708426026874 | 0.7455712927301495 |
|                 |                    |                    | 33 | 0.7443960038434292 | 0.7471161224494136 |
| 35              | 0.7533623830872845 | 0.7413079020573935 |    |                    |                    |
| 37              | 0.7452867016402287 | 0.7376615263723527 |    |                    |                    |

|  |  |  |         |                    |                    |
|--|--|--|---------|--------------------|--------------------|
|  |  |  | 39      | 0.7455998638864398 | 0.7420433700961337 |
|  |  |  | 41      | 0.733887084798955  | 0.7342069762908683 |
|  |  |  | 43      | 0.7418320203202213 | 0.7302771019372912 |
|  |  |  | 45      | 0.7246258659143779 | 0.7244295393371144 |
|  |  |  | 47      | 0.7221118990230886 | 0.72776886803631   |
|  |  |  | 49      | 0.71985142761094   | 0.7221447538419343 |
|  |  |  | 51      | 0.7348868558436732 | 0.7203579893935869 |
|  |  |  | 53      | 0.7304071046527277 | 0.7246008764098726 |
|  |  |  | 55      | 0.7150115845349121 | 0.7240253353019769 |
|  |  |  | 57      | 0.7138394703194568 | 0.7237842648092081 |
|  |  |  | 59      | 0.7126818472243981 | 0.7328094135573204 |
|  |  |  | 61      | 0.7137033146720118 | 0.732083517804328  |
|  |  |  | 63      | 0.7085708050111357 | 0.7253510865735322 |
|  |  |  | 65      | 0.7061811590415745 | 0.7239050919211715 |
|  |  |  | 67      | 0.7028592435676722 | 0.7141781390428374 |
|  |  |  | 69      | 0.697927118097579  | 0.7254380416244841 |
|  |  |  | 71      | 0.704152567205142  | 0.7210564736071559 |
|  |  |  | 73      | 0.6911158606405507 | 0.7199957283567127 |
|  |  |  | 75      | 0.6916590725477058 | 0.7182439110706116 |
|  |  |  | 77      | 0.6823578583351153 | 0.7097694290987795 |
|  |  |  | 79      | 0.6801979123956414 | 0.7125025638482325 |
|  |  |  | 81      | 0.664436470664489  | 0.7119066662567046 |
|  |  |  | 83      | 0.663898225871747  | 0.7108048151339528 |
|  |  |  | 85      | 0.6484286249336046 | 0.7111275480057813 |
|  |  |  | 87      | 0.6455734846865504 | 0.7096819730940409 |
|  |  |  | 89      | 0.6475884332175817 | 0.7147406452026885 |
|  |  |  | 91      | 0.6460630940574954 | 0.7034430255055726 |
|  |  |  | 93      | 0.6427436328232249 | 0.7010815353840871 |
|  |  |  | 95      | 0.6577728182558763 | 0.7092204809659383 |
|  |  |  | 97      | 0.654836250185979  | 0.7008445031365073 |
|  |  |  | 99      | 0.6360271080592259 | 0.7037307441270609 |
|  |  |  | 101     | 0.6333690590030778 | 0.7030180427920791 |
|  |  |  | 103     | 0.6318668249600476 | 0.6999007346676585 |
|  |  |  | 105     | 0.6246765883561535 | 0.6990749378415549 |
|  |  |  | 107     | 0.6253582971009171 | 0.6977632870443894 |
|  |  |  | 109     | 0.6242740308514589 | 0.6956233607051137 |
|  |  |  | 111     | 0.6238084539071662 | 0.6944569479008456 |
|  |  |  | 113     | 0.6180224254500141 | 0.6955209468444596 |
|  |  |  | 115     | 0.6171099569838884 | 0.6956002080821572 |
|  |  |  | 117     | 0.6131144020250396 | 0.6936738979535368 |
|  |  |  | 119     | 0.6088125797368547 | 0.6936733216676199 |
|  |  |  | Average | 0.7130329631175655 | 0.7271343808421905 |

| No. of features | Metric | Measure | k | Reuters-8 | Web-Kb |
|-----------------|--------|---------|---|-----------|--------|
|-----------------|--------|---------|---|-----------|--------|

|     |                    |                    |    |                    |                    |
|-----|--------------------|--------------------|----|--------------------|--------------------|
| ALL | BLAB_SM            | g Measure          | 1  | 0.9084632242360435 | 0.8161419153827852 |
|     |                    |                    | 3  | 0.8980865935012032 | 0.8147163870278432 |
|     |                    |                    | 5  | 0.9067457901367432 | 0.8376926244756131 |
|     |                    |                    | 7  | 0.8932264894915457 | 0.8451274108678803 |
|     |                    |                    | 9  | 0.8886367298451194 | 0.8398400371966197 |
|     |                    |                    | 11 | 0.8780742539489372 | 0.8367513524350162 |
|     |                    |                    | 13 | 0.8721266582101068 | 0.8350866493970043 |
|     |                    |                    | 15 | 0.8666685263322284 | 0.831622422395063  |
|     |                    |                    | 17 | 0.8527751744845485 | 0.8348222157550209 |
|     |                    |                    | 19 | 0.8591197729775433 | 0.8364772744147132 |
|     |                    |                    | 21 | 0.8440449256402538 | 0.8346079951912366 |
|     |                    |                    | 23 | 0.8451586053717836 | 0.8363950305815292 |
|     |                    |                    | 25 | 0.8405288925674572 | 0.8307470856994592 |
|     |                    |                    | 27 | 0.8354766023921866 | 0.8339883725461067 |
|     |                    |                    | 29 | 0.8325403929596263 | 0.8308413545592886 |
|     |                    |                    | 31 | 0.8326985981186216 | 0.8269356400128213 |
|     |                    |                    | 33 | 0.8301148796855847 | 0.82621164496161   |
|     |                    |                    | 35 | 0.8312057360401619 | 0.8248709840782751 |
|     |                    |                    | 37 | 0.8252070764204708 | 0.8238168632933657 |
|     |                    |                    | 39 | 0.824279383075627  | 0.8267106005668899 |
|     |                    |                    | 41 | 0.8171005002421968 | 0.8218430470831178 |
|     |                    |                    | 43 | 0.8215567247530494 | 0.8196212813718042 |
|     |                    |                    | 45 | 0.8128854324204333 | 0.8175265300372698 |
|     |                    |                    | 47 | 0.8111107786033047 | 0.819097196830832  |
|     |                    |                    | 49 | 0.8088182797117037 | 0.8164739984884711 |
|     |                    |                    | 51 | 0.8154726063016331 | 0.8161992746742175 |
|     |                    |                    | 53 | 0.8120203416650191 | 0.8184235620369672 |
|     |                    |                    | 55 | 0.8046410080057358 | 0.8193394344898687 |
|     |                    |                    | 57 | 0.8039200685496041 | 0.8179310438177151 |
|     |                    |                    | 59 | 0.8027890380261339 | 0.8207458373962118 |
|     |                    |                    | 61 | 0.8038236929825349 | 0.8212787696075806 |
|     |                    |                    | 63 | 0.7994920509802854 | 0.8181110793090195 |
|     |                    |                    | 65 | 0.798548275382059  | 0.8176592843442376 |
|     |                    |                    | 67 | 0.796246641820478  | 0.8127503781648264 |
|     |                    |                    | 69 | 0.7931883486448019 | 0.8176525493725513 |
|     |                    |                    | 71 | 0.7958260670997652 | 0.8159529448978202 |
|     |                    |                    | 73 | 0.7895703803326957 | 0.8147025143185045 |
|     |                    |                    | 75 | 0.7892658368623056 | 0.8151211563350296 |
|     |                    |                    | 77 | 0.7842743113431018 | 0.8116488265382794 |
|     |                    |                    | 79 | 0.7819100327915511 | 0.8128250301592806 |
| 81  | 0.7752376049593269 | 0.8118937601205616 |    |                    |                    |
| 83  | 0.7743575765376439 | 0.8111471243303127 |    |                    |                    |
| 85  | 0.7689824610119123 | 0.811445370179028  |    |                    |                    |
| 87  | 0.7664574210753902 | 0.8113070353684974 |    |                    |                    |
| 89  | 0.76744268382795   | 0.8142513672760013 |    |                    |                    |
| 91  | 0.7657844839730661 | 0.8084480080046127 |    |                    |                    |

|  |  |  |         |                    |                    |
|--|--|--|---------|--------------------|--------------------|
|  |  |  | 93      | 0.7645655407004347 | 0.8063357150246178 |
|  |  |  | 95      | 0.7686010380256835 | 0.8092913597583294 |
|  |  |  | 97      | 0.7669651087905733 | 0.8059294942008626 |
|  |  |  | 99      | 0.7598234735683156 | 0.8069039361078126 |
|  |  |  | 101     | 0.7579875119385479 | 0.8063178091187129 |
|  |  |  | 103     | 0.7578098622106644 | 0.8050491540604933 |
|  |  |  | 105     | 0.7543182339102542 | 0.8042712198990954 |
|  |  |  | 107     | 0.7532097339812889 | 0.8030455972472381 |
|  |  |  | 109     | 0.7517356915701682 | 0.8027024809939481 |
|  |  |  | 111     | 0.7514314481860361 | 0.8016154338428169 |
|  |  |  | 113     | 0.7477091560199821 | 0.802362942724085  |
|  |  |  | 115     | 0.7471617226477212 | 0.8021559871161799 |
|  |  |  | 117     | 0.7433686699726767 | 0.8009094708736411 |
|  |  |  | 119     | 0.7412932189074695 | 0.8007263371571822 |
|  |  |  | Average | 0.8065313560628213 | 0.8182402867252629 |

| No. of features | Metric             | Measure                | k  | Reuters-8          | Web-Kb             |
|-----------------|--------------------|------------------------|----|--------------------|--------------------|
| ALL             | BLAB_SM            | Average Mean Precision | 1  | 0.7523752085367694 | 0.6231205411228862 |
|                 |                    |                        | 3  | 0.7385754473788877 | 0.6430034343384782 |
|                 |                    |                        | 5  | 0.7621631663766981 | 0.6797113310599752 |
|                 |                    |                        | 7  | 0.7319350732624682 | 0.6974091514630626 |
|                 |                    |                        | 9  | 0.7291155580604117 | 0.6873466221288034 |
|                 |                    |                        | 11 | 0.7176203980586175 | 0.6825044391788027 |
|                 |                    |                        | 13 | 0.7005213563255008 | 0.6786838083885748 |
|                 |                    |                        | 15 | 0.6879547266636628 | 0.6749364373880243 |
|                 |                    |                        | 17 | 0.6628856097277198 | 0.6806419406254205 |
|                 |                    |                        | 19 | 0.676977307725456  | 0.6836945626951532 |
|                 |                    |                        | 21 | 0.6485569709896064 | 0.6806097502746645 |
|                 |                    |                        | 23 | 0.6526313829350257 | 0.684703636587195  |
|                 |                    |                        | 25 | 0.6438550899415241 | 0.6745589495698323 |
|                 |                    |                        | 27 | 0.6338842798819666 | 0.6784971298378363 |
|                 |                    |                        | 29 | 0.6283557065795828 | 0.6744080796710248 |
|                 |                    |                        | 31 | 0.6251197821996313 | 0.6670911608617718 |
|                 |                    |                        | 33 | 0.6267117025492719 | 0.6664476090049694 |
|                 |                    |                        | 35 | 0.6303490823896554 | 0.6640539034863684 |
|                 |                    |                        | 37 | 0.619855723995166  | 0.662056519881712  |
|                 |                    |                        | 39 | 0.6245683505994308 | 0.6661913602717325 |
| 41              | 0.611531385082114  | 0.6587869280231166     |    |                    |                    |
| 43              | 0.620108127849576  | 0.6546397928040959     |    |                    |                    |
| 45              | 0.6058486328292461 | 0.6520773219698983     |    |                    |                    |
| 47              | 0.602267211071071  | 0.6543465438542078     |    |                    |                    |
| 49              | 0.5999559623945083 | 0.6501162721635666     |    |                    |                    |
| 51              | 0.6113750551411441 | 0.6494822476824667     |    |                    |                    |

|  |  |  |         |                     |                    |
|--|--|--|---------|---------------------|--------------------|
|  |  |  | 53      | 0.6063393353770907  | 0.6537797570126822 |
|  |  |  | 55      | 0.5936314065156953  | 0.6543867449150681 |
|  |  |  | 57      | 0.5918239249651707  | 0.6527352526791238 |
|  |  |  | 59      | 0.5901847950819725  | 0.6583794654618891 |
|  |  |  | 61      | 0.5916227242030959  | 0.6590541536257175 |
|  |  |  | 63      | 0.5841914858472957  | 0.6529960873978441 |
|  |  |  | 65      | 0.5824857072771454  | 0.6525762192370049 |
|  |  |  | 67      | 0.5797239629251568  | 0.6446783577383963 |
|  |  |  | 69      | 0.5748038405432536  | 0.6531872471910393 |
|  |  |  | 71      | 0.5816741501046879  | 0.6506467411580638 |
|  |  |  | 73      | 0.5670938189386616  | 0.6493962557387877 |
|  |  |  | 75      | 0.5677604793378817  | 0.6486249112873185 |
|  |  |  | 77      | 0.5600942139656803  | 0.6420066384558187 |
|  |  |  | 79      | 0.5565637473150342  | 0.6440455669976498 |
|  |  |  | 81      | 0.5455002865013594  | 0.6431917340156583 |
|  |  |  | 83      | 0.544811312730056   | 0.6417274920968427 |
|  |  |  | 85      | 0.5369647206433745  | 0.6421152023448528 |
|  |  |  | 87      | 0.5329882884766144  | 0.6419302414050219 |
|  |  |  | 89      | 0.5361681282860318  | 0.6468796202535336 |
|  |  |  | 91      | 0.5339444988905938  | 0.6373024741725013 |
|  |  |  | 93      | 0.5293564805132261  | 0.6342302398963392 |
|  |  |  | 95      | 0.5369457897532637  | 0.6394761884397713 |
|  |  |  | 97      | 0.5357527322399598  | 0.633796766369581  |
|  |  |  | 99      | 0.5230526040131435  | 0.6358482579414318 |
|  |  |  | 101     | 0.5195190928316213  | 0.6347529070074893 |
|  |  |  | 103     | 0.5174925890784823  | 0.632382243832982  |
|  |  |  | 105     | 0.5099635822361801  | 0.6314224714760964 |
|  |  |  | 107     | 0.5110566508599397  | 0.6296372895741498 |
|  |  |  | 109     | 0.5096836691594337  | 0.6286856650082262 |
|  |  |  | 111     | 0.5092986168305139  | 0.6281979713652234 |
|  |  |  | 113     | 0.5017081253678877  | 0.6297072862520108 |
|  |  |  | 115     | 0.5004942102792522  | 0.629789021914902  |
|  |  |  | 117     | 0.49541647411846157 | 0.6272787271902506 |
|  |  |  | 119     | 0.4928220792794072  | 0.6272528043653398 |
|  |  |  | Average | 0.5949338637171891  | 0.6530202913025375 |

### SMTP Similarity Measure

| No. of features | Metric | Measure  | k | Reuters-8          | Web-Kb             |
|-----------------|--------|----------|---|--------------------|--------------------|
| All             | SmtP   | Accuracy | 1 | 0.9242752055387278 | 0.7805071315372425 |
|                 |        |          | 3 | 0.9316313284292514 | 0.8177496038034865 |

|  |  |  |     |                    |                    |
|--|--|--|-----|--------------------|--------------------|
|  |  |  | 5   | 0.9337948939852877 | 0.8193343898573693 |
|  |  |  | 7   | 0.9294677628732151 | 0.8225039619651348 |
|  |  |  | 9   | 0.927736910428386  | 0.8264659270998416 |
|  |  |  | 11  | 0.9281696235395932 | 0.8272583201267829 |
|  |  |  | 13  | 0.9255733448723497 | 0.8232963549920761 |
|  |  |  | 15  | 0.9208135006490696 | 0.8217115689381933 |
|  |  |  | 17  | 0.9225443530938987 | 0.820919175911252  |
|  |  |  | 19  | 0.9221116399826915 | 0.8248811410459588 |
|  |  |  | 21  | 0.9212462137602769 | 0.820919175911252  |
|  |  |  | 23  | 0.9208135006490696 | 0.8177496038034865 |
|  |  |  | 25  | 0.9186499350930333 | 0.8169572107765452 |
|  |  |  | 27  | 0.9182172219818261 | 0.8185419968304279 |
|  |  |  | 29  | 0.9177845088706188 | 0.8177496038034865 |
|  |  |  | 31  | 0.9186499350930333 | 0.8161648177496038 |
|  |  |  | 33  | 0.916486369536997  | 0.8114104595879557 |
|  |  |  | 35  | 0.9138900908697534 | 0.8090332805071315 |
|  |  |  | 37  | 0.9134573777585461 | 0.8114104595879557 |
|  |  |  | 39  | 0.9104283859800952 | 0.8114104595879557 |
|  |  |  | 41  | 0.9082648204240589 | 0.8098256735340729 |
|  |  |  | 43  | 0.9086975335352662 | 0.8082408874801902 |
|  |  |  | 45  | 0.9082648204240589 | 0.8090332805071315 |
|  |  |  | 47  | 0.906966681090437  | 0.8042789223454834 |
|  |  |  | 49  | 0.9073993942016443 | 0.8026941362916006 |
|  |  |  | 51  | 0.9056685417568152 | 0.805863708399366  |
|  |  |  | 53  | 0.9043704024231934 | 0.8066561014263075 |
|  |  |  | 55  | 0.9073993942016443 | 0.8019017432646592 |
|  |  |  | 57  | 0.9073993942016443 | 0.8011093502377179 |
|  |  |  | 59  | 0.9043704024231934 | 0.8003169572107766 |
|  |  |  | 61  | 0.9039376893119861 | 0.7987321711568938 |
|  |  |  | 63  | 0.9022068368671571 | 0.8003169572107766 |
|  |  |  | 65  | 0.9000432713111207 | 0.8011093502377179 |
|  |  |  | 67  | 0.898745131977499  | 0.8003169572107766 |
|  |  |  | 69  | 0.8978797057550844 | 0.8003169572107766 |
|  |  |  | 71  | 0.8970142795326699 | 0.8003169572107766 |
|  |  |  | 73  | 0.8952834270878408 | 0.8003169572107766 |
|  |  |  | 75  | 0.8944180008654262 | 0.7987321711568938 |
|  |  |  | 77  | 0.8948507139766335 | 0.7995245641838352 |
|  |  |  | 79  | 0.8948507139766335 | 0.7963549920760697 |
|  |  |  | 81  | 0.8944180008654262 | 0.7963549920760697 |
|  |  |  | 83  | 0.8931198615318044 | 0.7971473851030111 |
|  |  |  | 85  | 0.8926871484205972 | 0.7963549920760697 |
|  |  |  | 87  | 0.8905235828645608 | 0.7971473851030111 |
|  |  |  | 89  | 0.8913890090869754 | 0.7931854199683043 |
|  |  |  | 91  | 0.8922544353093899 | 0.7979397781299524 |
|  |  |  | 93  | 0.8918217221981826 | 0.7955625990491284 |
|  |  |  | 95  | 0.8913890090869754 | 0.7923930269413629 |
|  |  |  | 97  | 0.8900908697533535 | 0.7939778129952456 |
|  |  |  | 99  | 0.8900908697533535 | 0.7931854199683043 |
|  |  |  | 101 | 0.889225443530939  | 0.7939778129952456 |

|  |  |  |         |                    |                    |
|--|--|--|---------|--------------------|--------------------|
|  |  |  | 103     | 0.889225443530939  | 0.794770206022187  |
|  |  |  | 105     | 0.8887927304197317 | 0.7939778129952456 |
|  |  |  | 107     | 0.8870618779749027 | 0.794770206022187  |
|  |  |  | 109     | 0.88749459108611   | 0.7916006339144216 |
|  |  |  | 111     | 0.8866291648636954 | 0.7916006339144216 |
|  |  |  | 113     | 0.8857637386412809 | 0.7931854199683043 |
|  |  |  | 115     | 0.8848983124188663 | 0.7908082408874801 |
|  |  |  | 117     | 0.8853310255300736 | 0.7900158478605388 |
|  |  |  | 119     | 0.8848983124188663 | 0.7900158478605388 |
|  |  |  | Average | 0.9045146401269293 | 0.8043317485472785 |

| No. of features | Metric             | Measure            | k  | Reuters-8          | Web-Kb             |
|-----------------|--------------------|--------------------|----|--------------------|--------------------|
| All             | Smtp               | Precision          | 1  | 0.8598636149164065 | 0.7733549612838566 |
|                 |                    |                    | 3  | 0.8936548453581211 | 0.8077991049285923 |
|                 |                    |                    | 5  | 0.8919109409563388 | 0.8305637028174071 |
|                 |                    |                    | 7  | 0.898538569890855  | 0.8415905248305592 |
|                 |                    |                    | 9  | 0.8992701559174086 | 0.848202588875691  |
|                 |                    |                    | 11 | 0.9021326913899743 | 0.8551418766957511 |
|                 |                    |                    | 13 | 0.9019175303978881 | 0.8574875108167825 |
|                 |                    |                    | 15 | 0.8982767934896341 | 0.8533762598777066 |
|                 |                    |                    | 17 | 0.9031778176533807 | 0.8526680010036477 |
|                 |                    |                    | 19 | 0.8992240161136819 | 0.8566328111896753 |
|                 |                    |                    | 21 | 0.8963996545048238 | 0.8506025383328469 |
|                 |                    |                    | 23 | 0.8930771588153926 | 0.8486243002220797 |
|                 |                    |                    | 25 | 0.894157317591062  | 0.8481989672897815 |
|                 |                    |                    | 27 | 0.8940870829679358 | 0.8464027991486713 |
|                 |                    |                    | 29 | 0.8963235886197198 | 0.8561594660278871 |
|                 |                    |                    | 31 | 0.9036206935066031 | 0.851003129853749  |
|                 |                    |                    | 33 | 0.8916001893112713 | 0.8510819989263076 |
|                 |                    |                    | 35 | 0.8907227384192096 | 0.8549835781402177 |
|                 |                    |                    | 37 | 0.8920673995837369 | 0.8524347864419048 |
|                 |                    |                    | 39 | 0.8894516845220165 | 0.8534729787677902 |
|                 |                    |                    | 41 | 0.8879753774375243 | 0.8517651133976778 |
|                 |                    |                    | 43 | 0.8882006424973032 | 0.8498797384535117 |
|                 |                    |                    | 45 | 0.8942570004799603 | 0.8562178218723188 |
|                 |                    |                    | 47 | 0.8926078015179228 | 0.8521712685784071 |
|                 |                    |                    | 49 | 0.8892938787912226 | 0.8493249447075304 |
|                 |                    |                    | 51 | 0.8920664624548895 | 0.8517264855138043 |
|                 |                    |                    | 53 | 0.8896602259052722 | 0.852994593439518  |
|                 |                    |                    | 55 | 0.8984228826950011 | 0.8496760493598225 |
|                 |                    |                    | 57 | 0.8970431495169732 | 0.8492748067297209 |
|                 |                    |                    | 59 | 0.8924767322530782 | 0.8551806643291019 |
| 61              | 0.8911068619906188 | 0.8536525966104775 |    |                    |                    |
| 63              | 0.8904229002403357 | 0.8483033388975519 |    |                    |                    |
| 65              | 0.886612348873874  | 0.8488988096097871 |    |                    |                    |
| 67              | 0.8871621726929569 | 0.8483432485361166 |    |                    |                    |
| 69              | 0.8840646879557601 | 0.8548519047820615 |    |                    |                    |

|  |  |  |         |                    |                    |
|--|--|--|---------|--------------------|--------------------|
|  |  |  | 71      | 0.8845189045103138 | 0.8546699411414339 |
|  |  |  | 73      | 0.8822832359671995 | 0.8550432436635103 |
|  |  |  | 75      | 0.8893354813451544 | 0.8552875082502889 |
|  |  |  | 77      | 0.8898930257661137 | 0.8554241424389022 |
|  |  |  | 79      | 0.8890447258652208 | 0.8533380841152328 |
|  |  |  | 81      | 0.9018008009719044 | 0.8530807353698227 |
|  |  |  | 83      | 0.9004308927113689 | 0.853868528244595  |
|  |  |  | 85      | 0.899075303636018  | 0.8527135246466127 |
|  |  |  | 87      | 0.8955641685904021 | 0.8527688278306298 |
|  |  |  | 89      | 0.8965918860762092 | 0.8500844963405683 |
|  |  |  | 91      | 0.8988203128685887 | 0.8538434136489461 |
|  |  |  | 93      | 0.897776578312005  | 0.8520889284376376 |
|  |  |  | 95      | 0.8995099466704488 | 0.8587619387403319 |
|  |  |  | 97      | 0.897483819856021  | 0.8596559357880869 |
|  |  |  | 99      | 0.8972174773030521 | 0.851141826013278  |
|  |  |  | 101     | 0.8992236221678375 | 0.85142302531442   |
|  |  |  | 103     | 0.900812288495878  | 0.8604612825485063 |
|  |  |  | 105     | 0.9014771391166034 | 0.8601583372622977 |
|  |  |  | 107     | 0.9010162764226224 | 0.8605001698295986 |
|  |  |  | 109     | 0.9009858700265458 | 0.8584691221448558 |
|  |  |  | 111     | 0.8997315133334643 | 0.859099375730486  |
|  |  |  | 113     | 0.8972066080465328 | 0.8596398744343151 |
|  |  |  | 115     | 0.8953488642143426 | 0.8584972609561753 |
|  |  |  | 117     | 0.8968440093751121 | 0.85773707821968   |
|  |  |  | 119     | 0.898413523076952  | 0.8578354926035354 |
|  |  |  | Average | 0.8943542313992343 | 0.850960589400034  |

| No. of features | Metric             | Measure            | k  | Reuters-8          | Web-Kb             |
|-----------------|--------------------|--------------------|----|--------------------|--------------------|
| All             | Smtp               | Recall             | 1  | 0.8186085027991887 | 0.7326923603200535 |
|                 |                    |                    | 3  | 0.8240652275241114 | 0.7710860571031855 |
|                 |                    |                    | 5  | 0.8175545178984254 | 0.7620940644094595 |
|                 |                    |                    | 7  | 0.7930643724247868 | 0.7607346400675518 |
|                 |                    |                    | 9  | 0.786530828563565  | 0.7684890871463099 |
|                 |                    |                    | 11 | 0.7892585658727878 | 0.7632318660829905 |
|                 |                    |                    | 13 | 0.7862329597601236 | 0.7556255394336859 |
|                 |                    |                    | 15 | 0.7517659356025135 | 0.7519981505509206 |
|                 |                    |                    | 17 | 0.7583078936904253 | 0.7476381380937421 |
|                 |                    |                    | 19 | 0.7558731185000704 | 0.7484144940653981 |
|                 |                    |                    | 21 | 0.7447764014496421 | 0.7473002228951872 |
|                 |                    |                    | 23 | 0.7450814867741912 | 0.7419860889367027 |
|                 |                    |                    | 25 | 0.7463078202707889 | 0.741013898387355  |
|                 |                    |                    | 27 | 0.737658929163515  | 0.7418716847930604 |
|                 |                    |                    | 29 | 0.7308354329361937 | 0.7426117384457269 |
|                 |                    |                    | 31 | 0.7374183389678908 | 0.7401470774576288 |
|                 |                    |                    | 33 | 0.7295430353865815 | 0.7291117825364286 |
| 35              | 0.7267365216562105 | 0.7306947179332491 |    |                    |                    |
| 37              | 0.7255548431284393 | 0.7319031913531793 |    |                    |                    |

|  |  |  |         |                    |                    |
|--|--|--|---------|--------------------|--------------------|
|  |  |  | 39      | 0.7203304120481913 | 0.7306383779432427 |
|  |  |  | 41      | 0.7183047368641882 | 0.7280975837534671 |
|  |  |  | 43      | 0.7121228293170965 | 0.7258696143182037 |
|  |  |  | 45      | 0.7115229477169478 | 0.7262964345341059 |
|  |  |  | 47      | 0.6993713337325205 | 0.7176928268914108 |
|  |  |  | 49      | 0.6999602266240882 | 0.7147161779617124 |
|  |  |  | 51      | 0.7011574115171635 | 0.7183473041361268 |
|  |  |  | 53      | 0.684360215491365  | 0.7199920409782321 |
|  |  |  | 55      | 0.698871539891238  | 0.7136637082367862 |
|  |  |  | 57      | 0.6996241585392848 | 0.7117864258157474 |
|  |  |  | 59      | 0.689100558700544  | 0.7112793264242667 |
|  |  |  | 61      | 0.6846497175336186 | 0.7079898527400561 |
|  |  |  | 63      | 0.6718101044125626 | 0.7084879176075161 |
|  |  |  | 65      | 0.6600529533912334 | 0.7097436964934318 |
|  |  |  | 67      | 0.6574964704704567 | 0.7080989596513265 |
|  |  |  | 69      | 0.6512821538481373 | 0.7070374554023794 |
|  |  |  | 71      | 0.6504193766850791 | 0.7046057681238743 |
|  |  |  | 73      | 0.6484185041190655 | 0.7042168101676848 |
|  |  |  | 75      | 0.6469613078684723 | 0.7033297873440354 |
|  |  |  | 77      | 0.6470744180975602 | 0.7025720733255796 |
|  |  |  | 79      | 0.6448443793153806 | 0.7003111301807232 |
|  |  |  | 81      | 0.6476055347139467 | 0.7003111301807232 |
|  |  |  | 83      | 0.6413829282474309 | 0.7008182295722039 |
|  |  |  | 85      | 0.636105490801561  | 0.699249625931776  |
|  |  |  | 87      | 0.6301013091696446 | 0.6991644582060778 |
|  |  |  | 89      | 0.6325584979014974 | 0.6948698202629267 |
|  |  |  | 91      | 0.6315298673100083 | 0.699439012018625  |
|  |  |  | 93      | 0.6313481812634967 | 0.6975287558879933 |
|  |  |  | 95      | 0.6333687036583872 | 0.6936650841346454 |
|  |  |  | 97      | 0.629239913830701  | 0.6949118284965403 |
|  |  |  | 99      | 0.629556440196448  | 0.6936268131926806 |
|  |  |  | 101     | 0.626609328896533  | 0.6943664581630948 |
|  |  |  | 103     | 0.6268472202277728 | 0.6961165646248215 |
|  |  |  | 105     | 0.62308180249311   | 0.6954530528560847 |
|  |  |  | 107     | 0.6187561299771089 | 0.6958037398703094 |
|  |  |  | 109     | 0.6176212971766138 | 0.6931538387692635 |
|  |  |  | 111     | 0.6168009104805952 | 0.6922487468975724 |
|  |  |  | 113     | 0.6099566923237834 | 0.6931868124788565 |
|  |  |  | 115     | 0.6071930364432669 | 0.6896227849820987 |
|  |  |  | 117     | 0.6065645167328888 | 0.690020777462309  |
|  |  |  | 119     | 0.6070568142999168 | 0.6879780481399935 |
|  |  |  | Average | 0.6884365850783059 | 0.7180825609028388 |

| No. of features | Metric | Measure   | k | Reuters-8          | Web-Kb             |
|-----------------|--------|-----------|---|--------------------|--------------------|
| All             | Sntp   | F Measure | 1 | 0.8359119281044443 | 0.7434417215248428 |
|                 |        |           | 3 | 0.8496046286488044 | 0.7817050205199569 |
|                 |        |           | 5 | 0.8477528178733075 | 0.7783442674444401 |

|  |  |  |     |                    |                    |
|--|--|--|-----|--------------------|--------------------|
|  |  |  | 7   | 0.828919934282331  | 0.7781947008717819 |
|  |  |  | 9   | 0.8220295768361227 | 0.7874600981069939 |
|  |  |  | 11  | 0.8283205761137502 | 0.7830217954672261 |
|  |  |  | 13  | 0.8263698230328697 | 0.7739936792872943 |
|  |  |  | 15  | 0.7920020726110437 | 0.7706850592581738 |
|  |  |  | 17  | 0.8024303749434332 | 0.7648064404443443 |
|  |  |  | 19  | 0.7942729482005391 | 0.7662076054728477 |
|  |  |  | 21  | 0.7871702676986136 | 0.7657642861364364 |
|  |  |  | 23  | 0.7857934630091821 | 0.7603140274111014 |
|  |  |  | 25  | 0.7916088578485214 | 0.7596067263879549 |
|  |  |  | 27  | 0.7818058618790874 | 0.7604546747546752 |
|  |  |  | 29  | 0.7724529148464228 | 0.7614632671401993 |
|  |  |  | 31  | 0.7849804125295261 | 0.7582729032444867 |
|  |  |  | 33  | 0.7760364272079829 | 0.7452838487326918 |
|  |  |  | 35  | 0.7739756322456229 | 0.7491570642189683 |
|  |  |  | 37  | 0.7735851037042121 | 0.7501607120746365 |
|  |  |  | 39  | 0.7695961254274245 | 0.7481052672914812 |
|  |  |  | 41  | 0.7710933025149271 | 0.7449439504613501 |
|  |  |  | 43  | 0.7630532547198756 | 0.7420089647454423 |
|  |  |  | 45  | 0.7648032558441982 | 0.7431295034797393 |
|  |  |  | 47  | 0.7496844855404505 | 0.7322881592586101 |
|  |  |  | 49  | 0.7488688980858083 | 0.7273638222181726 |
|  |  |  | 51  | 0.7547794509061843 | 0.731518850914959  |
|  |  |  | 53  | 0.7300987596345535 | 0.7340989486439353 |
|  |  |  | 55  | 0.7494751972314506 | 0.7268762585172094 |
|  |  |  | 57  | 0.7500145754069979 | 0.724557928362092  |
|  |  |  | 59  | 0.739353452386349  | 0.7244729994023749 |
|  |  |  | 61  | 0.7353163256501529 | 0.7195232413400636 |
|  |  |  | 63  | 0.7179915846287996 | 0.7188710254591615 |
|  |  |  | 65  | 0.7018587186868588 | 0.7209303328745921 |
|  |  |  | 67  | 0.7002964242732708 | 0.7186247513023901 |
|  |  |  | 69  | 0.6940801381272028 | 0.7169415483123545 |
|  |  |  | 71  | 0.6930333785855805 | 0.7128614653218137 |
|  |  |  | 73  | 0.6908665283451901 | 0.7127679396111588 |
|  |  |  | 75  | 0.690956623517818  | 0.7136091930057487 |
|  |  |  | 77  | 0.6912892947345641 | 0.7106730075621942 |
|  |  |  | 79  | 0.6883639935746444 | 0.7085215927075385 |
|  |  |  | 81  | 0.6928051180862347 | 0.708459115853064  |
|  |  |  | 83  | 0.6864775384545059 | 0.7090865123641574 |
|  |  |  | 85  | 0.680920247778827  | 0.7062970478628483 |
|  |  |  | 87  | 0.6740197379315142 | 0.705020718016871  |
|  |  |  | 89  | 0.6760483467852392 | 0.7000533298359941 |
|  |  |  | 91  | 0.6744840851110931 | 0.7056538477131253 |
|  |  |  | 93  | 0.6742098854883104 | 0.7037790353414878 |
|  |  |  | 95  | 0.6799149548570302 | 0.6994981035502355 |
|  |  |  | 97  | 0.674625847318419  | 0.7005698291241729 |
|  |  |  | 99  | 0.6761259532622287 | 0.6997266634261314 |
|  |  |  | 101 | 0.6728218602036471 | 0.7002559712876122 |
|  |  |  | 103 | 0.6734175539598038 | 0.701592661482788  |

|  |  |  |         |                    |                    |
|--|--|--|---------|--------------------|--------------------|
|  |  |  | 105     | 0.6691524657327464 | 0.7010412115088761 |
|  |  |  | 107     | 0.6666044376808946 | 0.7013114462492097 |
|  |  |  | 109     | 0.6638680333321614 | 0.6989068857220383 |
|  |  |  | 111     | 0.6648062801017174 | 0.6970648220480462 |
|  |  |  | 113     | 0.6548190238574337 | 0.6979388951248592 |
|  |  |  | 115     | 0.6518748397074512 | 0.6922732265033849 |
|  |  |  | 117     | 0.6499141957945771 | 0.6937785061419897 |
|  |  |  | 119     | 0.6505104598910495 | 0.6894205062991661 |
|  |  |  | Average | 0.7326219709128835 | 0.7297125830791245 |

| No. of features | Metric             | Measure            | k  | Reuters-8          | Web-Kb             |
|-----------------|--------------------|--------------------|----|--------------------|--------------------|
| All             | SmtP               | g Measure          | 1  | 0.898186154025304  | 0.8216826304287296 |
|                 |                    |                    | 3  | 0.9019971011631044 | 0.8490753975340383 |
|                 |                    |                    | 5  | 0.898449335992961  | 0.8437326895979814 |
|                 |                    |                    | 7  | 0.8844555690174024 | 0.8432643465713541 |
|                 |                    |                    | 9  | 0.8806433132685395 | 0.8481585632663431 |
|                 |                    |                    | 11 | 0.8822140656271235 | 0.8451566202578895 |
|                 |                    |                    | 13 | 0.8802255977158652 | 0.8404330139529803 |
|                 |                    |                    | 15 | 0.8602673735913351 | 0.8380196985791334 |
|                 |                    |                    | 17 | 0.8641336548567871 | 0.8354340696114823 |
|                 |                    |                    | 19 | 0.8627125959173432 | 0.8363610127605892 |
|                 |                    |                    | 21 | 0.8562700247136099 | 0.8350874778183279 |
|                 |                    |                    | 23 | 0.856481905112551  | 0.8315671778150667 |
|                 |                    |                    | 25 | 0.8569663601964518 | 0.8308529426354367 |
|                 |                    |                    | 27 | 0.8518954477418609 | 0.8315880862469448 |
|                 |                    |                    | 29 | 0.8479266667723888 | 0.8318456345557073 |
|                 |                    |                    | 31 | 0.8517815155102519 | 0.8302674215032041 |
|                 |                    |                    | 33 | 0.847103564942328  | 0.8231712452927252 |
|                 |                    |                    | 35 | 0.8452738107954259 | 0.8235391368031079 |
|                 |                    |                    | 37 | 0.8444875822788298 | 0.82468989477939   |
|                 |                    |                    | 39 | 0.841162841448418  | 0.8238658853448038 |
|                 |                    |                    | 41 | 0.8398033018272747 | 0.8222408700014485 |
|                 |                    |                    | 43 | 0.836219526615799  | 0.8207256958022505 |
|                 |                    |                    | 45 | 0.8357792236632111 | 0.8210111547704005 |
|                 |                    |                    | 47 | 0.8284943687092339 | 0.8153957795869452 |
|                 |                    |                    | 49 | 0.8288989945865117 | 0.8135036262473432 |
|                 |                    |                    | 51 | 0.8294486573192845 | 0.816092002411039  |
|                 |                    |                    | 53 | 0.8193183716911838 | 0.8170728618483611 |
|                 |                    |                    | 55 | 0.8281483395730815 | 0.8126659413358314 |
|                 |                    |                    | 57 | 0.8286171163905756 | 0.8114059753307609 |
|                 |                    |                    | 59 | 0.8221110406651807 | 0.810947330368288  |
|                 |                    |                    | 61 | 0.8194334672040262 | 0.8088570240785508 |
| 63              | 0.8115224243472582 | 0.8093982002245865 |    |                    |                    |
| 65              | 0.8042435063816471 | 0.8102814839654638 |    |                    |                    |
| 67              | 0.802595232984736  | 0.8091759910077234 |    |                    |                    |
| 69              | 0.7987523274056509 | 0.808549427106883  |    |                    |                    |
| 71              | 0.7981335306996414 | 0.8071578227643672 |    |                    |                    |

|  |  |  |         |                    |                    |
|--|--|--|---------|--------------------|--------------------|
|  |  |  | 73      | 0.7967692207109237 | 0.8068874133316366 |
|  |  |  | 75      | 0.7957613683676419 | 0.8059765134837052 |
|  |  |  | 77      | 0.7958540039389981 | 0.8057244796097834 |
|  |  |  | 79      | 0.7944950192252626 | 0.8039082541754062 |
|  |  |  | 81      | 0.7960612018748704 | 0.8038915737679618 |
|  |  |  | 83      | 0.7921286582029472 | 0.8042766974848097 |
|  |  |  | 85      | 0.7888402501457001 | 0.8033295596031225 |
|  |  |  | 87      | 0.7849305531396943 | 0.8034221036081838 |
|  |  |  | 89      | 0.7865400587380179 | 0.8002927216352933 |
|  |  |  | 91      | 0.7859586475077457 | 0.803626382614618  |
|  |  |  | 93      | 0.785814600591119  | 0.8021754070728344 |
|  |  |  | 95      | 0.7869969425820883 | 0.7993669861535323 |
|  |  |  | 97      | 0.7843297023298165 | 0.8003673392170848 |
|  |  |  | 99      | 0.7845353414186801 | 0.7994346675428133 |
|  |  |  | 101     | 0.7826136995268942 | 0.8000255544174    |
|  |  |  | 103     | 0.7827140760444969 | 0.8011783684972361 |
|  |  |  | 105     | 0.7803206295858195 | 0.8006552729326283 |
|  |  |  | 107     | 0.7774236558026055 | 0.8010220152824364 |
|  |  |  | 109     | 0.7767540304469389 | 0.7989786548975388 |
|  |  |  | 111     | 0.7761768271895784 | 0.7984498080943813 |
|  |  |  | 113     | 0.7717877377553901 | 0.7992323564115873 |
|  |  |  | 115     | 0.7699930754856195 | 0.796776712108643  |
|  |  |  | 117     | 0.7696297497797705 | 0.7968894647627643 |
|  |  |  | 119     | 0.7698904068782796 | 0.7957326147293763 |
|  |  |  | Average | 0.8210078894670179 | 0.8155649175606708 |

| No. of features | Metric             | Measure             | k  | Reuters-8          | Web-Kb             |
|-----------------|--------------------|---------------------|----|--------------------|--------------------|
| All             | Smtp               | Avg. Mean Precision | 1  | 0.7179472739053987 | 0.6315100165074012 |
|                 |                    |                     | 3  | 0.7422517436069287 | 0.6737315970004674 |
|                 |                    |                     | 5  | 0.7388986802553508 | 0.677185100848743  |
|                 |                    |                     | 7  | 0.7185846277640895 | 0.6812222301062247 |
|                 |                    |                     | 9  | 0.7123070293366344 | 0.6901608497061913 |
|                 |                    |                     | 11 | 0.7178564746337572 | 0.6888771023921754 |
|                 |                    |                     | 13 | 0.7148716573365932 | 0.6815593088039815 |
|                 |                    |                     | 15 | 0.6792198169099218 | 0.6770844237710036 |
|                 |                    |                     | 17 | 0.6889572346877637 | 0.6728267917027244 |
|                 |                    |                     | 19 | 0.6838220976141433 | 0.6757135905974889 |
|                 |                    |                     | 21 | 0.6724861174265475 | 0.67259281988019   |
|                 |                    |                     | 23 | 0.670055160107875  | 0.6673180882942507 |
|                 |                    |                     | 25 | 0.6728318559143069 | 0.6663914942186941 |
|                 |                    |                     | 27 | 0.6643807198851956 | 0.6670623976399704 |
|                 |                    |                     | 29 | 0.6585688272338088 | 0.6705627111844851 |
|                 |                    |                     | 31 | 0.6702747123605943 | 0.6664918787163592 |
|                 |                    |                     | 33 | 0.6555130015277337 | 0.6557402846811262 |
|                 |                    |                     | 35 | 0.6523695241074488 | 0.6585648130393488 |
|                 |                    |                     | 37 | 0.652004133835677  | 0.6591541978450204 |
| 39              | 0.6461641164417671 | 0.6590452480448956  |    |                    |                    |

|  |  |  |         |                    |                    |
|--|--|--|---------|--------------------|--------------------|
|  |  |  | 41      | 0.6436623831534499 | 0.655883214005808  |
|  |  |  | 43      | 0.6376133740890042 | 0.6530454487218023 |
|  |  |  | 45      | 0.6408479355055341 | 0.6551905705338631 |
|  |  |  | 47      | 0.6278239908835181 | 0.6454910666070285 |
|  |  |  | 49      | 0.6264483504270629 | 0.6413401733714637 |
|  |  |  | 51      | 0.6289919431087119 | 0.6454598638530887 |
|  |  |  | 53      | 0.6108299164292466 | 0.6475960662805047 |
|  |  |  | 55      | 0.6305436002907541 | 0.6405120496265637 |
|  |  |  | 57      | 0.6300582078583847 | 0.6387679911010641 |
|  |  |  | 59      | 0.6180259632271696 | 0.6396822843025822 |
|  |  |  | 61      | 0.613509892099631  | 0.6358897937395989 |
|  |  |  | 63      | 0.6013041959362238 | 0.63560854318835   |
|  |  |  | 65      | 0.5869474286047136 | 0.6368368300133246 |
|  |  |  | 67      | 0.5849953906904282 | 0.6351957199741678 |
|  |  |  | 69      | 0.5777276687943665 | 0.6351391816448999 |
|  |  |  | 71      | 0.5768238546621826 | 0.6326098988766187 |
|  |  |  | 73      | 0.5735448052233237 | 0.6324098850244764 |
|  |  |  | 75      | 0.574506682220561  | 0.631968640575466  |
|  |  |  | 77      | 0.5750250514716303 | 0.6313934487322208 |
|  |  |  | 79      | 0.5726332202754891 | 0.6286505619377167 |
|  |  |  | 81      | 0.5804350616631457 | 0.6283827469835254 |
|  |  |  | 83      | 0.5736236737948006 | 0.6291999096111267 |
|  |  |  | 85      | 0.5678343341932465 | 0.6269936244686372 |
|  |  |  | 87      | 0.5600875767791602 | 0.6270200046811163 |
|  |  |  | 89      | 0.5629211077166647 | 0.6221375675812959 |
|  |  |  | 91      | 0.563378025343704  | 0.627855904357572  |
|  |  |  | 93      | 0.5627235966415965 | 0.6253615428346945 |
|  |  |  | 95      | 0.5662536505831464 | 0.6224553906910867 |
|  |  |  | 97      | 0.5610634452219746 | 0.6238042401273801 |
|  |  |  | 99      | 0.5611308950503038 | 0.6215986250856764 |
|  |  |  | 101     | 0.5593135648303008 | 0.6222543552517515 |
|  |  |  | 103     | 0.5605561446444611 | 0.6251337133933148 |
|  |  |  | 105     | 0.5573428388532162 | 0.6243650581060389 |
|  |  |  | 107     | 0.5536002259004782 | 0.6246106420588082 |
|  |  |  | 109     | 0.552441543429421  | 0.6214719925678792 |
|  |  |  | 111     | 0.5512003593928633 | 0.6209071407996329 |
|  |  |  | 113     | 0.542789910729728  | 0.6218769968822937 |
|  |  |  | 115     | 0.5387590656008214 | 0.6179365026249948 |
|  |  |  | 117     | 0.539012097905504  | 0.6182077255058196 |
|  |  |  | 119     | 0.5402844806634515 | 0.615966422302759  |
|  |  |  | Average | 0.6169330043130152 | 0.6443167713834459 |

**Results of Jaccard (these results led us to exclude Jaccard from any further consideration)**

| No. of features | Metric             | Measure             | k  | Reuters-8           | Web-Kb              |
|-----------------|--------------------|---------------------|----|---------------------|---------------------|
| ALL             | Jaccard            | Accuracy            | 1  | 0.32064041540458676 | 0.3969889064976228  |
|                 |                    |                     | 3  | 0.5114668974469927  | 0.22107765451664024 |
|                 |                    |                     | 5  | 0.5106014712245781  | 0.21949286846275753 |
|                 |                    |                     | 7  | 0.5101687581133708  | 0.21949286846275753 |
|                 |                    |                     | 9  | 0.5101687581133708  | 0.21949286846275753 |
|                 |                    |                     | 11 | 0.5101687581133708  | 0.22107765451664024 |
|                 |                    |                     | 13 | 0.5093033318909563  | 0.22107765451664024 |
|                 |                    |                     | 15 | 0.5093033318909563  | 0.22107765451664024 |
|                 |                    |                     | 17 | 0.5093033318909563  | 0.22107765451664024 |
|                 |                    |                     | 19 | 0.5093033318909563  | 0.22107765451664024 |
|                 |                    |                     | 21 | 0.5093033318909563  | 0.22107765451664024 |
|                 |                    |                     | 23 | 0.5093033318909563  | 0.22107765451664024 |
|                 |                    |                     | 25 | 0.5093033318909563  | 0.22107765451664024 |
|                 |                    |                     | 27 | 0.5093033318909563  | 0.22107765451664024 |
|                 |                    |                     | 29 | 0.5093033318909563  | 0.22107765451664024 |
|                 |                    |                     | 31 | 0.5093033318909563  | 0.22107765451664024 |
|                 |                    |                     | 33 | 0.5093033318909563  | 0.22107765451664024 |
|                 |                    |                     | 35 | 0.5093033318909563  | 0.22107765451664024 |
|                 |                    |                     | 37 | 0.5093033318909563  | 0.22107765451664024 |
|                 |                    |                     | 39 | 0.5093033318909563  | 0.22107765451664024 |
|                 |                    |                     | 41 | 0.5093033318909563  | 0.22107765451664024 |
|                 |                    |                     | 43 | 0.5093033318909563  | 0.22107765451664024 |
|                 |                    |                     | 45 | 0.5093033318909563  | 0.22107765451664024 |
|                 |                    |                     | 47 | 0.5093033318909563  | 0.22107765451664024 |
|                 |                    |                     | 49 | 0.5093033318909563  | 0.22107765451664024 |
|                 |                    |                     | 51 | 0.5093033318909563  | 0.22107765451664024 |
|                 |                    |                     | 53 | 0.5093033318909563  | 0.22107765451664024 |
|                 |                    |                     | 55 | 0.5093033318909563  | 0.22107765451664024 |
|                 |                    |                     | 57 | 0.5093033318909563  | 0.22107765451664024 |
|                 |                    |                     | 59 | 0.5093033318909563  | 0.22107765451664024 |
|                 |                    |                     | 61 | 0.5093033318909563  | 0.22107765451664024 |
|                 |                    |                     | 63 | 0.5093033318909563  | 0.22107765451664024 |
|                 |                    |                     | 65 | 0.5093033318909563  | 0.22107765451664024 |
| 67              | 0.5093033318909563 | 0.22107765451664024 |    |                     |                     |
| 69              | 0.5093033318909563 | 0.22107765451664024 |    |                     |                     |
| 71              | 0.5093033318909563 | 0.22107765451664024 |    |                     |                     |
| 73              | 0.5093033318909563 | 0.22107765451664024 |    |                     |                     |
| 75              | 0.5093033318909563 | 0.22107765451664024 |    |                     |                     |
| 77              | 0.5093033318909563 | 0.22107765451664024 |    |                     |                     |
| 79              | 0.5093033318909563 | 0.22107765451664024 |    |                     |                     |
| 81              | 0.5093033318909563 | 0.22107765451664024 |    |                     |                     |
| 83              | 0.5093033318909563 | 0.22107765451664024 |    |                     |                     |
| 85              | 0.5093033318909563 | 0.22107765451664024 |    |                     |                     |
| 87              | 0.5093033318909563 | 0.22107765451664024 |    |                     |                     |

|  |  |  |         |                    |                     |
|--|--|--|---------|--------------------|---------------------|
|  |  |  | 89      | 0.5093033318909563 | 0.22107765451664024 |
|  |  |  | 91      | 0.5093033318909563 | 0.22107765451664024 |
|  |  |  | 93      | 0.5093033318909563 | 0.22107765451664024 |
|  |  |  | 95      | 0.5093033318909563 | 0.22107765451664024 |
|  |  |  | 97      | 0.5093033318909563 | 0.22107765451664024 |
|  |  |  | 99      | 0.5093033318909563 | 0.22107765451664024 |
|  |  |  | 101     | 0.5093033318909563 | 0.22107765451664024 |
|  |  |  | 103     | 0.5093033318909563 | 0.22107765451664024 |
|  |  |  | 105     | 0.5093033318909563 | 0.22107765451664024 |
|  |  |  | 107     | 0.5093033318909563 | 0.22107765451664024 |
|  |  |  | 109     | 0.5093033318909563 | 0.22107765451664024 |
|  |  |  | 111     | 0.5093033318909563 | 0.22107765451664024 |
|  |  |  | 113     | 0.5093033318909563 | 0.22107765451664024 |
|  |  |  | 115     | 0.5093033318909563 | 0.22107765451664024 |
|  |  |  | 117     | 0.5093033318909563 | 0.22107765451664024 |
|  |  |  | 119     | 0.5093033318909563 | 0.22107765451664024 |
|  |  |  | Average | 0.5062599163421312 | 0.22393026941362945 |

| No. of features | Metric              | Measure             | k  | Reuters-8           | Web-Kb              |
|-----------------|---------------------|---------------------|----|---------------------|---------------------|
| ALL             | Jaccard             | Precision           | 1  | 0.7381543921916593  | 0.6733213429256595  |
|                 |                     |                     | 3  | 0.5013286334056399  | 0.3050476947535771  |
|                 |                     |                     | 5  | 0.15752329865626355 | 0.05496031746031746 |
|                 |                     |                     | 7  | 0.18871805976613254 | 0.05496031746031746 |
|                 |                     |                     | 9  | 0.18871805976613254 | 0.05496031746031746 |
|                 |                     |                     | 11 | 0.18871805976613254 | 0.05526941362916006 |
|                 |                     |                     | 13 | 0.06366291648636954 | 0.05526941362916006 |
|                 |                     |                     | 15 | 0.06366291648636954 | 0.05526941362916006 |
|                 |                     |                     | 17 | 0.06366291648636954 | 0.05526941362916006 |
|                 |                     |                     | 19 | 0.06366291648636954 | 0.05526941362916006 |
|                 |                     |                     | 21 | 0.06366291648636954 | 0.05526941362916006 |
|                 |                     |                     | 23 | 0.06366291648636954 | 0.05526941362916006 |
|                 |                     |                     | 25 | 0.06366291648636954 | 0.05526941362916006 |
|                 |                     |                     | 27 | 0.06366291648636954 | 0.05526941362916006 |
|                 |                     |                     | 29 | 0.06366291648636954 | 0.05526941362916006 |
|                 |                     |                     | 31 | 0.06366291648636954 | 0.05526941362916006 |
|                 |                     |                     | 33 | 0.06366291648636954 | 0.05526941362916006 |
|                 |                     |                     | 35 | 0.06366291648636954 | 0.05526941362916006 |
|                 |                     |                     | 37 | 0.06366291648636954 | 0.05526941362916006 |
|                 |                     |                     | 39 | 0.06366291648636954 | 0.05526941362916006 |
| 41              | 0.06366291648636954 | 0.05526941362916006 |    |                     |                     |
| 43              | 0.06366291648636954 | 0.05526941362916006 |    |                     |                     |
| 45              | 0.06366291648636954 | 0.05526941362916006 |    |                     |                     |
| 47              | 0.06366291648636954 | 0.05526941362916006 |    |                     |                     |
| 49              | 0.06366291648636954 | 0.05526941362916006 |    |                     |                     |

|  |  |  |         |                     |                     |
|--|--|--|---------|---------------------|---------------------|
|  |  |  | 51      | 0.06366291648636954 | 0.05526941362916006 |
|  |  |  | 53      | 0.06366291648636954 | 0.05526941362916006 |
|  |  |  | 55      | 0.06366291648636954 | 0.05526941362916006 |
|  |  |  | 57      | 0.06366291648636954 | 0.05526941362916006 |
|  |  |  | 59      | 0.06366291648636954 | 0.05526941362916006 |
|  |  |  | 61      | 0.06366291648636954 | 0.05526941362916006 |
|  |  |  | 63      | 0.06366291648636954 | 0.05526941362916006 |
|  |  |  | 65      | 0.06366291648636954 | 0.05526941362916006 |
|  |  |  | 67      | 0.06366291648636954 | 0.05526941362916006 |
|  |  |  | 69      | 0.06366291648636954 | 0.05526941362916006 |
|  |  |  | 71      | 0.06366291648636954 | 0.05526941362916006 |
|  |  |  | 73      | 0.06366291648636954 | 0.05526941362916006 |
|  |  |  | 75      | 0.06366291648636954 | 0.05526941362916006 |
|  |  |  | 77      | 0.06366291648636954 | 0.05526941362916006 |
|  |  |  | 79      | 0.06366291648636954 | 0.05526941362916006 |
|  |  |  | 81      | 0.06366291648636954 | 0.05526941362916006 |
|  |  |  | 83      | 0.06366291648636954 | 0.05526941362916006 |
|  |  |  | 85      | 0.06366291648636954 | 0.05526941362916006 |
|  |  |  | 87      | 0.06366291648636954 | 0.05526941362916006 |
|  |  |  | 89      | 0.06366291648636954 | 0.05526941362916006 |
|  |  |  | 91      | 0.06366291648636954 | 0.05526941362916006 |
|  |  |  | 93      | 0.06366291648636954 | 0.05526941362916006 |
|  |  |  | 95      | 0.06366291648636954 | 0.05526941362916006 |
|  |  |  | 97      | 0.06366291648636954 | 0.05526941362916006 |
|  |  |  | 99      | 0.06366291648636954 | 0.05526941362916006 |
|  |  |  | 101     | 0.06366291648636954 | 0.05526941362916006 |
|  |  |  | 103     | 0.06366291648636954 | 0.05526941362916006 |
|  |  |  | 105     | 0.06366291648636954 | 0.05526941362916006 |
|  |  |  | 107     | 0.06366291648636954 | 0.05526941362916006 |
|  |  |  | 109     | 0.06366291648636954 | 0.05526941362916006 |
|  |  |  | 111     | 0.06366291648636954 | 0.05526941362916006 |
|  |  |  | 113     | 0.06366291648636954 | 0.05526941362916006 |
|  |  |  | 115     | 0.06366291648636954 | 0.05526941362916006 |
|  |  |  | 117     | 0.06366291648636954 | 0.05526941362916006 |
|  |  |  | 119     | 0.06366291648636954 | 0.05526941362916006 |
|  |  |  | Average | 0.09001596656359843 | 0.06971779566106667 |

| No. of features | Metric  | Measure | k  | Reuters-8           | Web-Kb              |
|-----------------|---------|---------|----|---------------------|---------------------|
| ALL             | Jaccard | Recall  | 1  | 0.17237140539926543 | 0.25768044672296236 |
|                 |         |         | 3  | 0.13333997029048483 | 0.24968717524548792 |
|                 |         |         | 5  | 0.12957317073170732 | 0.2482078853046595  |
|                 |         |         | 7  | 0.12804878048780488 | 0.2482078853046595  |
|                 |         |         | 9  | 0.12804878048780488 | 0.2482078853046595  |
|                 |         |         | 11 | 0.12804878048780488 | 0.25                |

|  |  |  |     |       |      |
|--|--|--|-----|-------|------|
|  |  |  | 13  | 0.125 | 0.25 |
|  |  |  | 15  | 0.125 | 0.25 |
|  |  |  | 17  | 0.125 | 0.25 |
|  |  |  | 19  | 0.125 | 0.25 |
|  |  |  | 21  | 0.125 | 0.25 |
|  |  |  | 23  | 0.125 | 0.25 |
|  |  |  | 25  | 0.125 | 0.25 |
|  |  |  | 27  | 0.125 | 0.25 |
|  |  |  | 29  | 0.125 | 0.25 |
|  |  |  | 31  | 0.125 | 0.25 |
|  |  |  | 33  | 0.125 | 0.25 |
|  |  |  | 35  | 0.125 | 0.25 |
|  |  |  | 37  | 0.125 | 0.25 |
|  |  |  | 39  | 0.125 | 0.25 |
|  |  |  | 41  | 0.125 | 0.25 |
|  |  |  | 43  | 0.125 | 0.25 |
|  |  |  | 45  | 0.125 | 0.25 |
|  |  |  | 47  | 0.125 | 0.25 |
|  |  |  | 49  | 0.125 | 0.25 |
|  |  |  | 51  | 0.125 | 0.25 |
|  |  |  | 53  | 0.125 | 0.25 |
|  |  |  | 55  | 0.125 | 0.25 |
|  |  |  | 57  | 0.125 | 0.25 |
|  |  |  | 59  | 0.125 | 0.25 |
|  |  |  | 61  | 0.125 | 0.25 |
|  |  |  | 63  | 0.125 | 0.25 |
|  |  |  | 65  | 0.125 | 0.25 |
|  |  |  | 67  | 0.125 | 0.25 |
|  |  |  | 69  | 0.125 | 0.25 |
|  |  |  | 71  | 0.125 | 0.25 |
|  |  |  | 73  | 0.125 | 0.25 |
|  |  |  | 75  | 0.125 | 0.25 |
|  |  |  | 77  | 0.125 | 0.25 |
|  |  |  | 79  | 0.125 | 0.25 |
|  |  |  | 81  | 0.125 | 0.25 |
|  |  |  | 83  | 0.125 | 0.25 |
|  |  |  | 85  | 0.125 | 0.25 |
|  |  |  | 87  | 0.125 | 0.25 |
|  |  |  | 89  | 0.125 | 0.25 |
|  |  |  | 91  | 0.125 | 0.25 |
|  |  |  | 93  | 0.125 | 0.25 |
|  |  |  | 95  | 0.125 | 0.25 |
|  |  |  | 97  | 0.125 | 0.25 |
|  |  |  | 99  | 0.125 | 0.25 |
|  |  |  | 101 | 0.125 | 0.25 |
|  |  |  | 103 | 0.125 | 0.25 |

|  |  |  |         |                     |                     |
|--|--|--|---------|---------------------|---------------------|
|  |  |  | 105     | 0.125               | 0.25                |
|  |  |  | 107     | 0.125               | 0.25                |
|  |  |  | 109     | 0.125               | 0.25                |
|  |  |  | 111     | 0.125               | 0.25                |
|  |  |  | 113     | 0.125               | 0.25                |
|  |  |  | 115     | 0.125               | 0.25                |
|  |  |  | 117     | 0.125               | 0.25                |
|  |  |  | 119     | 0.125               | 0.25                |
|  |  |  | Average | 0.12615718146474786 | 0.25003318796470714 |

| No. of features | Metric              | Measure             | k  | Reuters-8           | Web-Kb              |
|-----------------|---------------------|---------------------|----|---------------------|---------------------|
| ALL             | Jaccard             | F Measure           | 1  | 0.14113715104000615 | 0.1571998407175876  |
|                 |                     |                     | 3  | 0.10083852892810236 | 0.09305178154540933 |
|                 |                     |                     | 5  | 0.0931784503244066  | 0.08999350227420402 |
|                 |                     |                     | 7  | 0.09036144578313252 | 0.08999350227420402 |
|                 |                     |                     | 9  | 0.09036144578313252 | 0.08999350227420402 |
|                 |                     |                     | 11 | 0.09036144578313252 | 0.09052563270603504 |
|                 |                     |                     | 13 | 0.08436066513761468 | 0.09052563270603504 |
|                 |                     |                     | 15 | 0.08436066513761468 | 0.09052563270603504 |
|                 |                     |                     | 17 | 0.08436066513761468 | 0.09052563270603504 |
|                 |                     |                     | 19 | 0.08436066513761468 | 0.09052563270603504 |
|                 |                     |                     | 21 | 0.08436066513761468 | 0.09052563270603504 |
|                 |                     |                     | 23 | 0.08436066513761468 | 0.09052563270603504 |
|                 |                     |                     | 25 | 0.08436066513761468 | 0.09052563270603504 |
|                 |                     |                     | 27 | 0.08436066513761468 | 0.09052563270603504 |
|                 |                     |                     | 29 | 0.08436066513761468 | 0.09052563270603504 |
|                 |                     |                     | 31 | 0.08436066513761468 | 0.09052563270603504 |
|                 |                     |                     | 33 | 0.08436066513761468 | 0.09052563270603504 |
|                 |                     |                     | 35 | 0.08436066513761468 | 0.09052563270603504 |
|                 |                     |                     | 37 | 0.08436066513761468 | 0.09052563270603504 |
|                 |                     |                     | 39 | 0.08436066513761468 | 0.09052563270603504 |
|                 |                     |                     | 41 | 0.08436066513761468 | 0.09052563270603504 |
|                 |                     |                     | 43 | 0.08436066513761468 | 0.09052563270603504 |
|                 |                     |                     | 45 | 0.08436066513761468 | 0.09052563270603504 |
|                 |                     |                     | 47 | 0.08436066513761468 | 0.09052563270603504 |
|                 |                     |                     | 49 | 0.08436066513761468 | 0.09052563270603504 |
|                 |                     |                     | 51 | 0.08436066513761468 | 0.09052563270603504 |
|                 |                     |                     | 53 | 0.08436066513761468 | 0.09052563270603504 |
|                 |                     |                     | 55 | 0.08436066513761468 | 0.09052563270603504 |
|                 |                     |                     | 57 | 0.08436066513761468 | 0.09052563270603504 |
|                 |                     |                     | 59 | 0.08436066513761468 | 0.09052563270603504 |
| 61              | 0.08436066513761468 | 0.09052563270603504 |    |                     |                     |
| 63              | 0.08436066513761468 | 0.09052563270603504 |    |                     |                     |
| 65              | 0.08436066513761468 | 0.09052563270603504 |    |                     |                     |

|  |  |  |         |                     |                     |
|--|--|--|---------|---------------------|---------------------|
|  |  |  | 67      | 0.08436066513761468 | 0.09052563270603504 |
|  |  |  | 69      | 0.08436066513761468 | 0.09052563270603504 |
|  |  |  | 71      | 0.08436066513761468 | 0.09052563270603504 |
|  |  |  | 73      | 0.08436066513761468 | 0.09052563270603504 |
|  |  |  | 75      | 0.08436066513761468 | 0.09052563270603504 |
|  |  |  | 77      | 0.08436066513761468 | 0.09052563270603504 |
|  |  |  | 79      | 0.08436066513761468 | 0.09052563270603504 |
|  |  |  | 81      | 0.08436066513761468 | 0.09052563270603504 |
|  |  |  | 83      | 0.08436066513761468 | 0.09052563270603504 |
|  |  |  | 85      | 0.08436066513761468 | 0.09052563270603504 |
|  |  |  | 87      | 0.08436066513761468 | 0.09052563270603504 |
|  |  |  | 89      | 0.08436066513761468 | 0.09052563270603504 |
|  |  |  | 91      | 0.08436066513761468 | 0.09052563270603504 |
|  |  |  | 93      | 0.08436066513761468 | 0.09052563270603504 |
|  |  |  | 95      | 0.08436066513761468 | 0.09052563270603504 |
|  |  |  | 97      | 0.08436066513761468 | 0.09052563270603504 |
|  |  |  | 99      | 0.08436066513761468 | 0.09052563270603504 |
|  |  |  | 101     | 0.08436066513761468 | 0.09052563270603504 |
|  |  |  | 103     | 0.08436066513761468 | 0.09052563270603504 |
|  |  |  | 105     | 0.08436066513761468 | 0.09052563270603504 |
|  |  |  | 107     | 0.08436066513761468 | 0.09052563270603504 |
|  |  |  | 109     | 0.08436066513761468 | 0.09052563270603504 |
|  |  |  | 111     | 0.08436066513761468 | 0.09052563270603504 |
|  |  |  | 113     | 0.08436066513761468 | 0.09052563270603504 |
|  |  |  | 115     | 0.08436066513761468 | 0.09052563270603504 |
|  |  |  | 117     | 0.08436066513761468 | 0.09052563270603504 |
|  |  |  | 119     | 0.08436066513761468 | 0.09052563270603504 |
|  |  |  | Average | 0.08602857308455167 | 0.09165236546529218 |

| No. of features | Metric  | Measure   | k  | Reuters-8           | Web-Kb             |
|-----------------|---------|-----------|----|---------------------|--------------------|
| ALL             | Jaccard | g Measure | 1  | 0.38928521652432113 | 0.4404205864122005 |
|                 |         |           | 3  | 0.34169159656632886 | 0.432700865147008  |
|                 |         |           | 5  | 0.33678834464593904 | 0.4312708318887152 |
|                 |         |           | 7  | 0.33476993947454486 | 0.4312708318887152 |
|                 |         |           | 9  | 0.33476993947454486 | 0.4312708318887152 |
|                 |         |           | 11 | 0.33476993947454486 | 0.4330127018922193 |
|                 |         |           | 13 | 0.33071891388307384 | 0.4330127018922193 |
|                 |         |           | 15 | 0.33071891388307384 | 0.4330127018922193 |
|                 |         |           | 17 | 0.33071891388307384 | 0.4330127018922193 |
|                 |         |           | 19 | 0.33071891388307384 | 0.4330127018922193 |
|                 |         |           | 21 | 0.33071891388307384 | 0.4330127018922193 |
|                 |         |           | 23 | 0.33071891388307384 | 0.4330127018922193 |
|                 |         |           | 25 | 0.33071891388307384 | 0.4330127018922193 |
|                 |         |           | 27 | 0.33071891388307384 | 0.4330127018922193 |

|  |  |  |     |                     |                    |
|--|--|--|-----|---------------------|--------------------|
|  |  |  | 29  | 0.33071891388307384 | 0.4330127018922193 |
|  |  |  | 31  | 0.33071891388307384 | 0.4330127018922193 |
|  |  |  | 33  | 0.33071891388307384 | 0.4330127018922193 |
|  |  |  | 35  | 0.33071891388307384 | 0.4330127018922193 |
|  |  |  | 37  | 0.33071891388307384 | 0.4330127018922193 |
|  |  |  | 39  | 0.33071891388307384 | 0.4330127018922193 |
|  |  |  | 41  | 0.33071891388307384 | 0.4330127018922193 |
|  |  |  | 43  | 0.33071891388307384 | 0.4330127018922193 |
|  |  |  | 45  | 0.33071891388307384 | 0.4330127018922193 |
|  |  |  | 47  | 0.33071891388307384 | 0.4330127018922193 |
|  |  |  | 49  | 0.33071891388307384 | 0.4330127018922193 |
|  |  |  | 51  | 0.33071891388307384 | 0.4330127018922193 |
|  |  |  | 53  | 0.33071891388307384 | 0.4330127018922193 |
|  |  |  | 55  | 0.33071891388307384 | 0.4330127018922193 |
|  |  |  | 57  | 0.33071891388307384 | 0.4330127018922193 |
|  |  |  | 59  | 0.33071891388307384 | 0.4330127018922193 |
|  |  |  | 61  | 0.33071891388307384 | 0.4330127018922193 |
|  |  |  | 63  | 0.33071891388307384 | 0.4330127018922193 |
|  |  |  | 65  | 0.33071891388307384 | 0.4330127018922193 |
|  |  |  | 67  | 0.33071891388307384 | 0.4330127018922193 |
|  |  |  | 69  | 0.33071891388307384 | 0.4330127018922193 |
|  |  |  | 71  | 0.33071891388307384 | 0.4330127018922193 |
|  |  |  | 73  | 0.33071891388307384 | 0.4330127018922193 |
|  |  |  | 75  | 0.33071891388307384 | 0.4330127018922193 |
|  |  |  | 77  | 0.33071891388307384 | 0.4330127018922193 |
|  |  |  | 79  | 0.33071891388307384 | 0.4330127018922193 |
|  |  |  | 81  | 0.33071891388307384 | 0.4330127018922193 |
|  |  |  | 83  | 0.33071891388307384 | 0.4330127018922193 |
|  |  |  | 85  | 0.33071891388307384 | 0.4330127018922193 |
|  |  |  | 87  | 0.33071891388307384 | 0.4330127018922193 |
|  |  |  | 89  | 0.33071891388307384 | 0.4330127018922193 |
|  |  |  | 91  | 0.33071891388307384 | 0.4330127018922193 |
|  |  |  | 93  | 0.33071891388307384 | 0.4330127018922193 |
|  |  |  | 95  | 0.33071891388307384 | 0.4330127018922193 |
|  |  |  | 97  | 0.33071891388307384 | 0.4330127018922193 |
|  |  |  | 99  | 0.33071891388307384 | 0.4330127018922193 |
|  |  |  | 101 | 0.33071891388307384 | 0.4330127018922193 |
|  |  |  | 103 | 0.33071891388307384 | 0.4330127018922193 |
|  |  |  | 105 | 0.33071891388307384 | 0.4330127018922193 |
|  |  |  | 107 | 0.33071891388307384 | 0.4330127018922193 |
|  |  |  | 109 | 0.33071891388307384 | 0.4330127018922193 |
|  |  |  | 111 | 0.33071891388307384 | 0.4330127018922193 |
|  |  |  | 113 | 0.33071891388307384 | 0.4330127018922193 |
|  |  |  | 115 | 0.33071891388307384 | 0.4330127018922193 |
|  |  |  | 117 | 0.33071891388307384 | 0.4330127018922193 |
|  |  |  | 119 | 0.33071891388307384 | 0.4330127018922193 |

|  |  |  |         |                    |                    |
|--|--|--|---------|--------------------|--------------------|
|  |  |  | Average | 0.3321816054307702 | 0.4330438758549573 |
|--|--|--|---------|--------------------|--------------------|

| No. of features | Metric  | Measure             | k  | Reuters-8           | Web-Kb              |
|-----------------|---------|---------------------|----|---------------------|---------------------|
| ALL             | Jaccard | Avg. Mean Precision | 1  | 0.16555048602727107 | 0.25564814324564417 |
|                 |         |                     | 3  | 0.132563198504498   | 0.25086296393439544 |
|                 |         |                     | 5  | 0.12837799280197176 | 0.2496931195743032  |
|                 |         |                     | 7  | 0.12799574548976606 | 0.2496931195743032  |
|                 |         |                     | 9  | 0.12799574548976606 | 0.2496931195743032  |
|                 |         |                     | 11 | 0.12799574548976606 | 0.24999999999999997 |
|                 |         |                     | 13 | 0.125               | 0.24999999999999997 |
|                 |         |                     | 15 | 0.125               | 0.24999999999999997 |
|                 |         |                     | 17 | 0.125               | 0.24999999999999997 |
|                 |         |                     | 19 | 0.125               | 0.24999999999999997 |
|                 |         |                     | 21 | 0.125               | 0.24999999999999997 |
|                 |         |                     | 23 | 0.125               | 0.24999999999999997 |
|                 |         |                     | 25 | 0.125               | 0.24999999999999997 |
|                 |         |                     | 27 | 0.125               | 0.24999999999999997 |
|                 |         |                     | 29 | 0.125               | 0.24999999999999997 |
|                 |         |                     | 31 | 0.125               | 0.24999999999999997 |
|                 |         |                     | 33 | 0.125               | 0.24999999999999997 |
|                 |         |                     | 35 | 0.125               | 0.24999999999999997 |
|                 |         |                     | 37 | 0.125               | 0.24999999999999997 |
|                 |         |                     | 39 | 0.125               | 0.24999999999999997 |
|                 |         |                     | 41 | 0.125               | 0.24999999999999997 |
|                 |         |                     | 43 | 0.125               | 0.24999999999999997 |
|                 |         |                     | 45 | 0.125               | 0.24999999999999997 |
|                 |         |                     | 47 | 0.125               | 0.24999999999999997 |
|                 |         |                     | 49 | 0.125               | 0.24999999999999997 |
|                 |         |                     | 51 | 0.125               | 0.24999999999999997 |
|                 |         |                     | 53 | 0.125               | 0.24999999999999997 |
|                 |         |                     | 55 | 0.125               | 0.24999999999999997 |
|                 |         |                     | 57 | 0.125               | 0.24999999999999997 |
|                 |         |                     | 59 | 0.125               | 0.24999999999999997 |
|                 |         |                     | 61 | 0.125               | 0.24999999999999997 |
| 63              | 0.125   | 0.24999999999999997 |    |                     |                     |
| 65              | 0.125   | 0.24999999999999997 |    |                     |                     |
| 67              | 0.125   | 0.24999999999999997 |    |                     |                     |
| 69              | 0.125   | 0.24999999999999997 |    |                     |                     |
| 71              | 0.125   | 0.24999999999999997 |    |                     |                     |
| 73              | 0.125   | 0.24999999999999997 |    |                     |                     |
| 75              | 0.125   | 0.24999999999999997 |    |                     |                     |
| 77              | 0.125   | 0.24999999999999997 |    |                     |                     |
| 79              | 0.125   | 0.24999999999999997 |    |                     |                     |
| 81              | 0.125   | 0.24999999999999997 |    |                     |                     |

|  |  |  |         |                    |                     |
|--|--|--|---------|--------------------|---------------------|
|  |  |  | 83      | 0.125              | 0.24999999999999997 |
|  |  |  | 85      | 0.125              | 0.24999999999999997 |
|  |  |  | 87      | 0.125              | 0.24999999999999997 |
|  |  |  | 89      | 0.125              | 0.24999999999999997 |
|  |  |  | 91      | 0.125              | 0.24999999999999997 |
|  |  |  | 93      | 0.125              | 0.24999999999999997 |
|  |  |  | 95      | 0.125              | 0.24999999999999997 |
|  |  |  | 97      | 0.125              | 0.24999999999999997 |
|  |  |  | 99      | 0.125              | 0.24999999999999997 |
|  |  |  | 101     | 0.125              | 0.24999999999999997 |
|  |  |  | 103     | 0.125              | 0.24999999999999997 |
|  |  |  | 105     | 0.125              | 0.24999999999999997 |
|  |  |  | 107     | 0.125              | 0.24999999999999997 |
|  |  |  | 109     | 0.125              | 0.24999999999999997 |
|  |  |  | 111     | 0.125              | 0.24999999999999997 |
|  |  |  | 113     | 0.125              | 0.24999999999999997 |
|  |  |  | 115     | 0.125              | 0.24999999999999997 |
|  |  |  | 117     | 0.125              | 0.24999999999999997 |
|  |  |  | 119     | 0.125              | 0.24999999999999997 |
|  |  |  | Average | 0.1260079818967173 | 0.2500931744317158  |
